# Supplementary material for: Artificial intelligence to predict needs for urgent revascularization from 12-leads electrocardiography in emergency patients
Source: PLoS One. 2019 Jan 9;14(1):e0210103. doi: 10.1371/journal.pone.0210103 (PMC6326503; doi:10.1371/journal.pone.0210103)
Supplement: S7 File — The raw calculation sheet for the quartile analysis in validation cohort. (XLSX) [file pone.0210103.s007.xlsx]

## Sheet: Sheet1
Quartile	Numbers of patients with urgent revascularization	Numbers of patients without urgent revascularization	% patients with urgent revascularization
1	3	58	4.91803			Fisher test
2	13	47	21.6667			2.2e-16
3	40	21	65.5738
4	54	7	88.5246
